# Supplementary material
Source: PubMed Central journal article supplement (PMC10524338)
Supplement: NIHMS1903186-supplement-1.pdf [file NIHMS1903186-supplement-1.pdf]

## Supplementary Materials

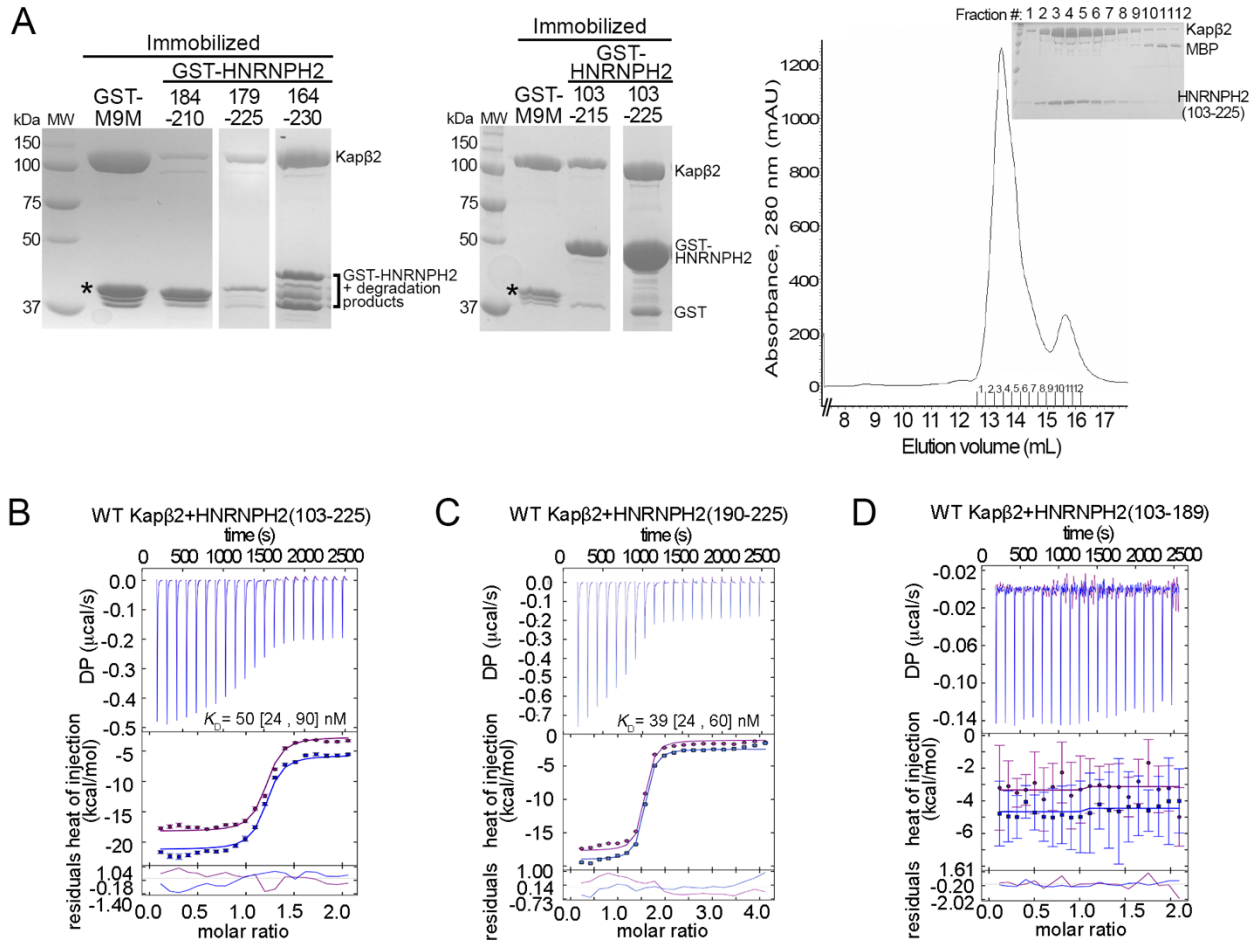

**Figure S1. Identifying a stable HNRNPH2 fragment for optimal Kap $\beta$ 2 interaction, related to Figure 1 and Table 1. (A)** Left and middle panels: Pull-down binding assay of Kap $\beta$ 2 with immobilized GST-HNRNPH2 constructs (on glutathione beads) of different lengths. Beads incubated with Kap $\beta$ 2 were washed extensively before bound proteins were visualized by SDS-PAGE and Coomassie staining. Asterisks (\*) label the immobilized positive control GST-M9M. GST-HNRNPH2(184-210) pulls down very little Kap $\beta$ 2, GST-HNRNPH2(179-225) does not express well and the bracket indicates degraded GST-HNRNPH2(164-230). GST-HNRNPH2(103-225) in the last lane of the middle panel shows minimal degradation and binds well to Kap $\beta$ 2. Right panel, size exclusion chromatography of a mixture of Kap $\beta$ 2 and HNRNPH2(103-225), showing stable interaction of the two proteins. The MBP is from the cleavage of His<sub>6</sub>-MBP-HNRNPH2(103-225) with Tev protease. **(B-D)** ITC analysis of Kap $\beta$ 2 binding to MBP-HNRNPH2 fragments. Top panels show the reconstructed thermograms from NITPIC, middle panels show the binding isotherms and individual fits and bottom panels show fitting residuals. Dissociation constants ( $K_D$ s) obtained from global analysis of duplicate measurements are displayed with 95% confidence intervals in brackets. For **(D)**, no binding can be observed.

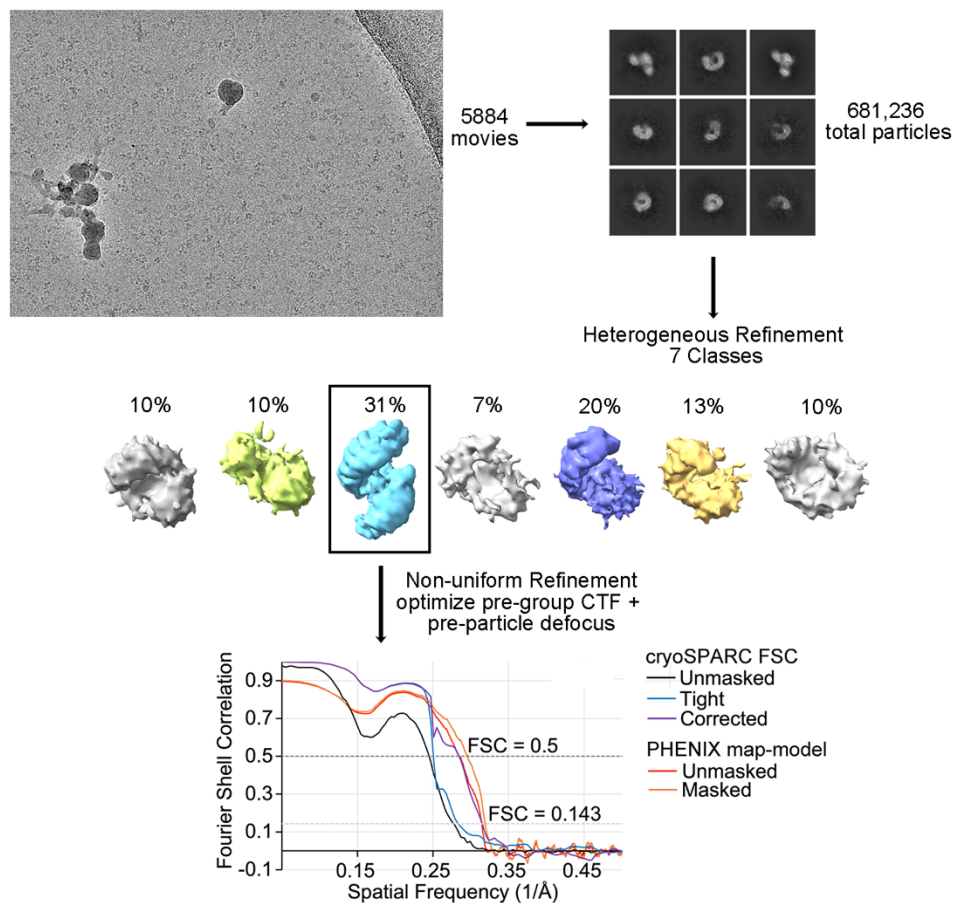

**Figure S2. Cryo-EM structure determination of Kap $\beta$ 2•HNRNPH2(103-225), related to Figure 1.** 5884 movies were processed and 681,236 total particles (9 representative 2D templates are shown) were selected for 3D classification. Particles were classified into 7 classes using Heterogeneous Refinement. The most populated class has the best-looking map (light blue), which was used for Non-uniform Refinement to obtain the final map. The rest of the classes appear to be junk particles (gray) or incomplete/poorly aligned Kap $\beta$ 2 particles (other colors). FSC curves for final map from cryoSPARC (unmasked in black, tight/corrected mask in blue/purple) and map-model FSC from PHENIX (unmasked/masked in red/orange) were displayed.

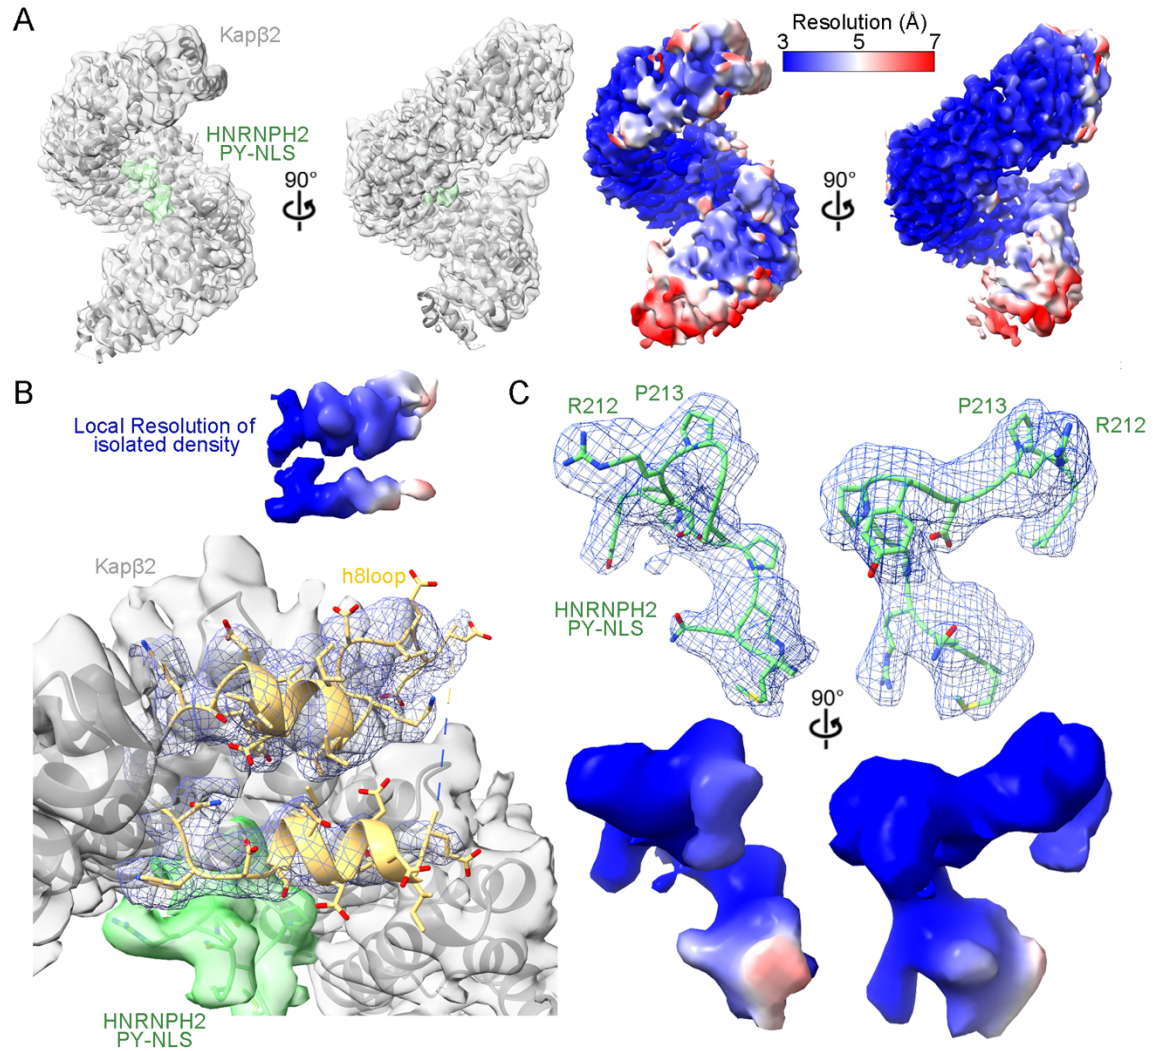

**Figure S3. Map densities and local map resolution for Kap $\beta$ 2•HNRNPH2(103-225), related to Figure 1. (A)** The Kap $\beta$ 2•HNRNPH2 model docked into the final map, colored gray for Kap $\beta$ 2 and green for HNRNPH2. The same map is colored according to local resolution on the right. **(B-C)** Isolated map density (blue mesh) for the h8loop (yellow cartoon) **(B)** and the PY-NLS **(C)** and their corresponding local resolution.

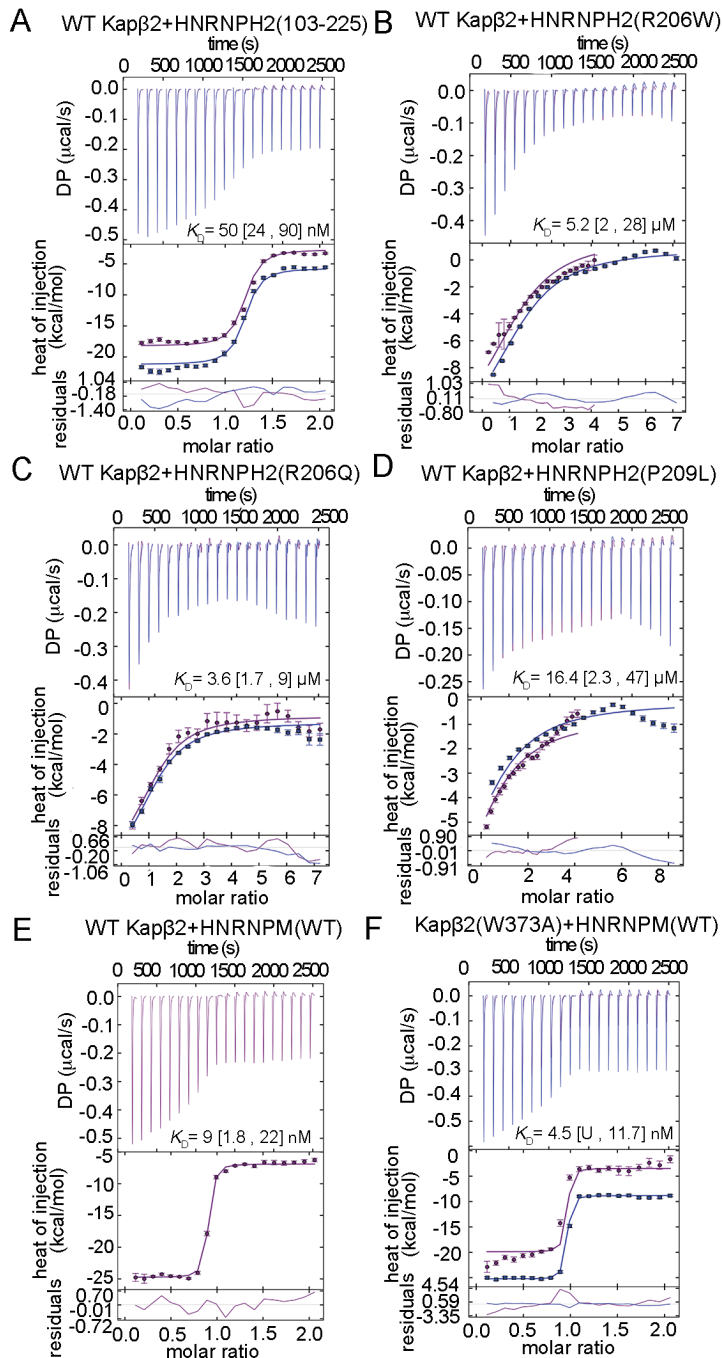

**Figure S4. Mutagenesis analysis of Kap $\beta$ 2 binding to HNRNPH2 and HNRNPM PY-NLSs by ITC, related to Figure 1 and Table 1. (A-D) ITC titrations of MBP-HNRNPH2(130-225) with indicated mutations into Kap $\beta$ 2 WT. (A) is the same data with MBP-HNRNPH2(130-225) WT as Figure S1B, repeated here for comparison with MBP-HNRNPH2(130-225) mutants. Top panels illustrate the reconstructed thermograms from NITPIC, middle panels show the binding isotherm and individual fits, fitting residuals are plotted below.  $K_D$ s obtained from global analysis of duplicate measurement are displayed with 95% confidence intervals in brackets. (E-F) As in (A-D), but MBP-HNRNPM PY-NLS were titrated into WT Kap $\beta$ 2 (E) and Kap $\beta$ 2(W373A) (F). U - unable to be determined. The  $K_D$  in (F) was obtained from global analysis of duplicate measurement and the  $K_D$  in (E) from a single experiment, which matches the previously reported  $K_D$  for the same WT Kap $\beta$ 2 and MBP-HNRNPM PY-NLS constructs.<sup>1</sup>**

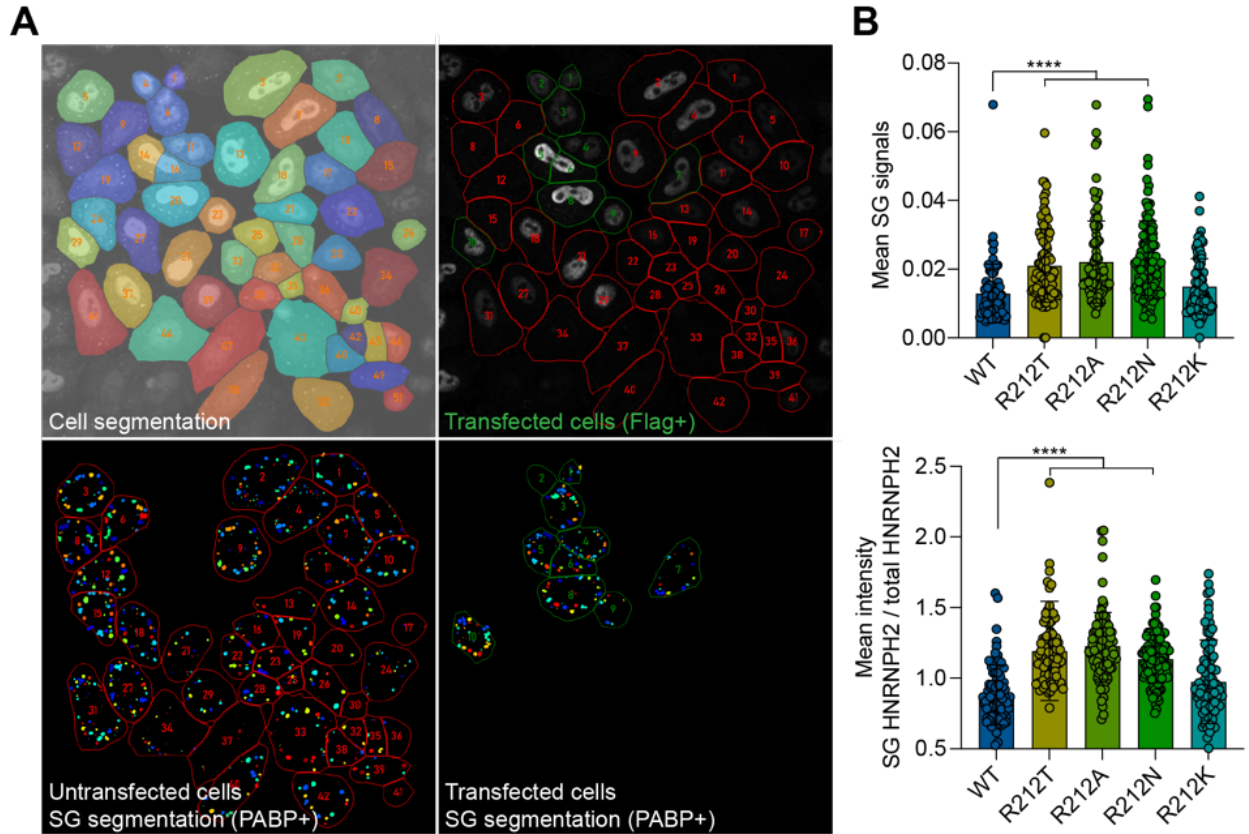

**Figure S5. Automated puncta detection analysis for measuring stress granule association, related to Figure 3. (A)** An example of data filtering and analysis using CellProfiler pipeline. The top left image shows a preview of cell segmentation with the total cell count, where only cells touching the edges were removed. The top right image displays the FLAG-stained cells, with their respective index numbers, where untransfected cells are overlaid with red and transfected cells with green. The bottom left and right images show stress granules detected in each untransfected and transfected cell, respectively. **(B)** Mean HNRNPH2 signal of all stress granules (top) and integrated HNRNPH2 signals of stress granules normalized to integrated signals of total HNRNPH2. The graphs represent the mean  $\pm$  S.D. \*\*\*\* $P < 0.0001$  by one-way ANOVA Dunnett's multiple comparison's test.

**Table S1. Primers used in this study, related to STAR Methods.**

| Name                                        | Primer Sequence                               |
|---------------------------------------------|-----------------------------------------------|
| For HNRNPH2 fragments                       |                                               |
| 184 Forward (BamHI)                         | GCGGATCCTTCAAGAGTAGCCGAGCTGAAG                |
| 210 Reverse (Xho1)                          | GCAGCTCGAGTTAATAGGGACCTGGCCGCTG               |
| 179 Forward (BamHI)                         | GGCGGATCCAGGTACATTGAGATCTTCAAGAGTAG           |
| 225 Reverse (Xho1)                          | GCAGCTCGAGTTATCCTCTGCCAATGCTATTATAC           |
| 164 Forward (BamHI)                         | GCGGATCCATAGCTGAGAAGGCCTTAAAG                 |
| 230 Reverse (Xho1)                          | CAGCTCGAGTTACCTTTCAAACCCAGCTC                 |
| 103 Forward (BamHI)                         | GCGGATCCAATAGCCCTGATACTGCCAACG                |
| 215 Reverse (Xho1)                          | GCAGCTCGAGTTAAGCCCCCGCCTATCATAG               |
| 189 Reverse (Xho1)                          | CAGCTCGAGTTAAGCTCGGCTACTCTTGAAG               |
| For pHis-Mal-tev-HNRNPH2 mutants            |                                               |
| R212K Forward                               | AGGTCCCTATGATAAGCCGGGGGCTGGCA                 |
| R212K Reverse                               | TGCCAGCCCCCGGCTTATCATAGGGACCT                 |
| R212A Forward                               | AGGTCCCTATGATGCGCCGGGGGCTGGCA                 |
| R212A Reverse                               | TGCCAGCCCCCGGCGCATCATAGGGACCT                 |
| For pcDNA3.1(+) FLAG-tagged HNRNPH2 mutants |                                               |
| R212K Forward                               | CCCTATGATAAGCCGGGGGCT                         |
| R212K/N Reverse                             | ACCTGGCCGCTGCATAGC                            |
| R212A Forward                               | TCCCTATGATGCGCCGGGGGCTGG                      |
| R212A Reverse                               | CCTGGCCGCTGCATAGCC                            |
| R212N Forward                               | CCCTATGATAATCCGGGGGCTGGCAG                    |
| For Kap $\beta$ 2 mutant                    |                                               |
| W373A Forward                               | GGCGATAACAATTTTCAGACGCGAATCTAAGAAAATGTTCTGCTG |
| W373A Reverse                               | CAGCAGAACATTTTCTTAGATTCGCGTCTGAAATTGTATCGCC   |

**References**

1. Cansizoglu, A.E., Lee, B.J., Zhang, Z.C., Fontoura, B.M., and Chook, Y.M. (2007). Structure-based design of a pathway-specific nuclear import inhibitor. *Nat Struct Mol Biol* 14, 452-454. 10.1038/nsmb1229.
